# Supplementary material for: Voluntary adoption of social welfare-enhancing behavior: Mask-wearing in Spain during the COVID-19 outbreak
Source: PubMed Central journal article supplement (PMC7707551; doi:10.1371/journal.pone.0242764), 2020-12-01
Supplement: pone.0242764.s001.pdf [file pone.0242764.s001.pdf]

# S1 Appendix

419

## A Data collection

420

### A.1 Survey questions

421

For the set of demographics, we included gender, age group, and educational attainment.

422

We asked four questions: a) “How likely is that you have had or you currently have Coronavirus?” (from “Extremely unlikely” to “Extremely likely”); b) “How worried are you that you or someone in your family will be infected to the Coronavirus?” (from “Not worried at all” to “Very worried”); c) “What is your perceived likelihood of being infected with the Coronavirus in the future?” (from “Not possible at all” to “Very likely”) and, d) “No one wants to be infected with the Coronavirus, but if you are unfortunately infected, are you confident that you will be able to access to adequate medical care?” (from “Not confident at all” to “Very confident”).

423

424

425

426

427

428

429

430

Near the end of the survey, we added the Big-Five Inventory (BFI) validated in the Spanish language [27]. The BFI is a 10-item measure of the Big Five (or Five-Factor Model) personality domains, namely Extroversion, Openness, Conscientiousness, Agreeableness, and Emotional Stability (or Neuroticism).

431

432

433

434

The survey allows us to geo-locate respondents in their province and region of residence. We compute the average in the use of face mask among all respondents who live in the same province (or region) of the respondent to generate a measure of social acceptability of the mask-wearing behavior. Note that we exclude the same respondent from these computations to avoid measure endogeneity. In essence, this variable captures a descriptive norm of mask usage in the social context of the respondent.

435

436

437

438

439

440

Occupational categories are collapsed in 13 categories: 1) business manager (combines “Big businesses” and “Small businesses” were asked independently in the survey but they are combined in the analyses because each gathered few responses), 2) engineers, 3) medical workers (combines “Doctors” and “Nurses” were asked independently in the survey but they are combined in the analyses because each gathered few responses), 4) teachers, 5) other qualified professionals, 6) middle skilled workers, 7) middle managers and supervisors (“Middle Managers” and “Supervisors” were asked independently in the survey but they are combined in the analyses because each gathered few responses), 8) technicians, 9) agriculture and industrial workers (combines “Agriculture workers” and “Industrial workers” were asked independently in the survey but they are combined in the analyses because each gathered few responses), 10) unskilled workers, 11) retired (indirectly built through a combination of age above 65 and a missing value in occupation), 12) students (indirectly built through a combination of age below 25 and a missing value in occupation), 13) unclassified and others.

441

442

443

444

445

446

447

448

449

450

451

452

453

454

Additionally, we control more directly for how much time respondents spend at home. The survey asks “After the outbreak of Novel Coronavirus (COVID-2019), have you stayed home more than usual?,” and the respondents could select “Definitely yes”, “Mostly yes”, “Mostly not”, and “Definitely not”. Note that the category “Not sure” was also an option and has been recoded as a missing value for analysis. Further, we also control for how the COVID had an impact on respondents’ job. The survey asks “Has your job been affected by the Coronavirus?”, and the respondents had the following options: “Yes, I have been affected by an ERTE”, “Yes, I have been dismissed”, “Yes, I have had to work from home”, and “No, I have not been affected”.

455

456

457

458

459

460

461

462

463

## B Methods

464

Ordinal logistic regression analysis was used to explore statistical associations between wearing a face mask and the following factors: 1) Demographic characteristics, 2) Risk perceptions concerning the COVID-19, 3) Personality traits, and 4) Social acceptance of the mask-wearing behavior. Results were displayed in the log odds scale with 95% Confidence Intervals (95% CI). All analysis were performed using **R** (version 3.6.3). For the social acceptance models we estimated clustered standard errors to account for the within-region and the within-province correlation across observation in the independent variables.

465

466

467

468

469

470

471

472

We computed the average in the use of face mask among all respondents who live in the same region and province of the respondent to generate a measure of social acceptability of the mask-wearing behavior. To avoid endogeneity in the measure, we exclude the same respondent from these computations.

473

474

475

476

## C Descriptive statistics

Table C.1. Demographic characteristics of respondents

---

| Characteristics    | Proportions |       |
|--------------------|-------------|-------|
| <b>Gender</b>      | Proportion  | N     |
| Male               | 49.6%       | 1,939 |
| Female             | 50.4%       | 1,967 |
| All                | 100%        | 3,906 |
| <b>Age</b>         |             |       |
| Age: 18-25         | 10.2%       | 398   |
| Age: 26-35         | 14.4%       | 561   |
| Age: 36-45         | 18.9%       | 737   |
| Age: 46-55         | 18.8%       | 736   |
| Age: 56-65         | 15.4%       | 601   |
| Age: 65+           | 22.3%       | 873   |
| All                | 100%        | 3,906 |
| <b>Occupation</b>  |             |       |
| Secondary or lower | 14.3%       | 557   |
| High School        | 27.0%       | 1,053 |
| Some college       | 12.0%       | 470   |
| College            | 31.8%       | 1,244 |
| Graduate school    | 14.9%       | 582   |
| All                | 100%        | 3,906 |
| <b>Occupation</b>  |             |       |
| Other              | 97.8%       | 3,820 |
| Physician          | 0.8%        | 30    |
| Nurse              | 1.4%        | 56    |
| All                | 100%        | 3,906 |

---

## D Linear models

478

### D.1 Demographics

479

**Table D.1. Linear Regressions Investigating the Association Between Demographic Characteristics and Mask Use**

|                                 | DV: Wearing a face mask |         |
|---------------------------------|-------------------------|---------|
|                                 | $\beta$ (95% CI)        | P Value |
| <b>Gender</b>                   |                         |         |
| Male                            |                         |         |
| Female                          | 0.00 (-0.08, 0.08)      | .92     |
| <b>Age</b>                      |                         |         |
| Age: 18–25                      |                         |         |
| Age: 26–35                      | 0.41 (0.23, 0.59)       | < .01   |
| Age: 36–45                      | 0.42 (0.27, 0.57)       | < .01   |
| Age: 46–55                      | 0.39 (0.24, 0.54)       | < .01   |
| Age: 56–65                      | 0.47 (0.31, 0.63)       | < .01   |
| Age: 65+                        | 0.52 (0.06, 0.99)       | .03     |
| <b>Education</b>                |                         |         |
| Secondary or lower              |                         |         |
| High School                     | -0.08 (-0.20, 0.05)     | .22     |
| Some college                    | -0.06 (-0.21, 0.09)     | .41     |
| College                         | -0.16 (-0.28, -0.03)    | .01     |
| Graduate school                 | -0.21 (-0.37, -0.06)    | .01     |
| <b>Time at home (last week)</b> | 0.00 (-0.09, 0.09)      | 1.00    |
| <b>COVID job impact</b>         |                         |         |
| Inactive                        |                         |         |
| Dismissal                       | 0.40 (0.13, 0.68)       | < .01   |
| Temporary dismissal (ERTE)      | 0.44 (0.15, 0.73)       | < .01   |
| Telework                        | 0.09 (-0.18, 0.36)      | .50     |
| Not affected                    | 0.41 (0.14, 0.69)       | < .01   |
| <b>Occupation Fixed Effects</b> | Yes                     | Yes     |
| N                               | 3,906                   |         |

## D.2 Risk perceptions

**Table D.2. Linear Regressions of the Association Between Risk Perceptions and Mask Use**

|                                            | DV: Wearing a face mask |         |                      |         |
|--------------------------------------------|-------------------------|---------|----------------------|---------|
|                                            | $\beta$ (95% CI)        | P Value | $\beta$ (95% CI)     | P Value |
| <b>Likely to be infected now</b>           |                         |         |                      |         |
| Very unlikely                              |                         |         |                      |         |
| Unlikely                                   | 0.01 (-0.10, 0.11)      | 0.92    | 0.00 (-0.11, 0.10)   | .97     |
| Neither likely nor unlikely                | 0.19 (0.09, 0.28)       | < .01   | 0.14 (0.04, 0.23)    | < .01   |
| Likely                                     | 0.28 (0.10-0.46)        | < .01   | 0.25 (0.07, 0.43)    | .01     |
| Very likely                                | 0.75 (0.44, 1.05)       | < .01   | 0.60 (0.30, 0.90)    | < .01   |
| <b>Concerned about becoming infected</b>   |                         |         |                      |         |
| Not concerned at all                       |                         |         |                      |         |
| Not concerned                              | 0.16 (-0.14,0.46)       | .31     | 0.12 (-0.19, 0.43)   | .43     |
| Somewhat concerned                         | 0.31 (0.04, 0.58)       | .02     | 0.27 (-0.01, 0.54)   | .06     |
| Very concerned                             | 0.59 (0.32, 0.85)       | < .01   | 0.54 (0.26, 0.81)    | < .01   |
| <b>Likely to be infected in the future</b> |                         |         |                      |         |
| Very unlikely                              |                         |         |                      |         |
| Unlikely                                   | -0.12 (-0.40, 0.16)     | .42     | -0.25 (-0.54, 0.05)  | .10     |
| Neither likely nor unlikely                | -0.06 (-0.34, 0.22)     | .68     | -0.23 (-0.53, 0.07)  | .13     |
| Likely                                     | -0.08 (-0.36, 0.20)     | .58     | -0.18 (-0.48, 0.12)  | .23     |
| Very likely                                | -0.21 (-0.51, 0.09)     | .17     | -0.32 (-0.64, -0.01) | .04     |
| <b>Trust in health system</b>              |                         |         |                      |         |
| Do not trust                               |                         |         |                      |         |
| Tend not to trust                          | 0.24 (0.01, 0.46)       | .04     | 0.22 (-0.01, 0.44)   | .06     |
| Tend to trust                              | 0.16 (-0.06, 0.37)      | .15     | 0.12 (-0.10, 0.34)   | .27     |
| Trust                                      | 0.17 (-0.04, 0.39)      | .12     | 0.13 (-0.09, 0.35)   | .25     |
| <b>Controls</b>                            |                         |         |                      |         |
| Demographics?                              | No                      |         | Yes                  |         |
| Occupation Fixed Effects?                  | No                      |         | Yes                  |         |
| Time at home?                              | No                      |         | Yes                  |         |
| COVID job impact?                          | No                      |         | Yes                  |         |
| N                                          | 3,958                   |         | 3,769                |         |

### D.3 Personality traits

**Table D.3. Linear Regressions of the Association Between Personality Traits and Mask Use**

|                             | DV: Wearing a face mask |         |                    |         |
|-----------------------------|-------------------------|---------|--------------------|---------|
|                             | $\beta$ (95% CI)        | P Value | $\beta$ (95% CI)   | P Value |
| <b>Personality traits</b>   |                         |         |                    |         |
| Extroversion                | 0.05 (0.03, 0.06)       | < .01   | 0.04 (0.02, 0.05)  | < .01   |
| Openness to new experiences | -0.01 (-0.03, 0.01)     | .41     | 0.00 (-0.02, 0.02) | .73     |
| Agreeableness               | 0.01 (-0.02, 0.03)      | .62     | 0.01 (-0.02, 0.03) | .45     |
| Conscientiousness           | 0.00 (-0.01, 0.02)      | .68     | 0.00 (-0.02, 0.02) | .83     |
| Neuroticism                 | -0.01 (-0.03, 0.01)     | .34     | 0.00 (-0.02, 0.01) | .66     |
| <b>Controls</b>             |                         |         |                    |         |
| Demographics?               | No                      |         | Yes                |         |
| Occupation Fixed Effects?   | No                      |         | Yes                |         |
| Time at home?               | No                      |         | Yes                |         |
| COVID job impact?           | No                      |         | Yes                |         |
| N                           | 3,948                   |         | 3,902              |         |
| AIC                         | 10,128                  |         | 9,826              |         |

## D.4 Social acceptability

**Table D.4. Linear Regressions of the Association Between Social Acceptability and Mask Use**

| Panel A: Regional Level                                                |                  | DV: Wearing a face mask |                  |         |
|------------------------------------------------------------------------|------------------|-------------------------|------------------|---------|
|                                                                        | $\beta$ (95% CI) | P Value                 | $\beta$ (95% CI) | P Value |
| <b>Social Acceptability</b>                                            |                  |                         |                  |         |
| Regional average of mask users                                         | 2.90 (2.01-4.19) | < .01                   | 3.23 (2.19-4.79) | < .01   |
| <i>log</i> Positive cases in the region<br>(per 100,000 inhabitants)   | 0.99 (0.91-1.08) | .88                     | 0.76 (0.28-2.10) | .59     |
| Demographics?                                                          | No               |                         | Yes              |         |
| Occupation Fixed Effects?                                              | No               |                         | Yes              |         |
| Time at home?                                                          | No               |                         | Yes              |         |
| COVID job impact?                                                      | No               |                         | Yes              |         |
| Survey date FE                                                         | Yes              |                         | Yes              |         |
| N                                                                      | 4,132            |                         | 3,901            |         |
| N Regions                                                              | 18               |                         | 18               |         |
| AIC                                                                    | 10,602           |                         | 9,815            |         |
| Panel B: Province Level                                                |                  | DV: Wearing a face mask |                  |         |
|                                                                        | OR (95% CI)      | P Value                 | OR (95% CI)      | P Value |
| <b>Social Acceptability</b>                                            |                  |                         |                  |         |
| Provincial average of mask users                                       | 2.34 (1.78-3.08) | < .01                   | 2.41 (1.82-3.20) | < .01   |
| <i>log</i> Positive cases in the province<br>(per 100,000 inhabitants) | 1.01 (0.93-1.09) | .84                     | 1.01 (0.94-1.10) | .60     |
| Demographics?                                                          | No               |                         | Yes              |         |
| Occupation Fixed Effects?                                              | No               |                         | Yes              |         |
| Time at home?                                                          | No               |                         | Yes              |         |
| COVID job impact?                                                      | No               |                         | Yes              |         |
| Survey date FE                                                         | Yes              |                         | Yes              |         |
| N                                                                      | 3,934            |                         | 3,893            |         |
| N Provinces                                                            | 52               |                         | 52               |         |
| AIC                                                                    | 10,091           |                         | 9,782            |         |

## E Interaction model

**Table E.1. The Association Between Demographic Characteristics and Mask Use by the Prevalence of Mask-wearing Behavior in the Province. Interaction Model.**

|                                                  | DV: Wearing a face mask |               |         |
|--------------------------------------------------|-------------------------|---------------|---------|
|                                                  | Coefficient             | 95% CI        | P-Value |
| Area with High Prevalence of Masks               | 2.40                    | (-0.43, 5.23) | .10     |
| Female                                           | -0.13                   | (-0.33, 0.08) | .22     |
| Age: 26-35                                       | 0.75                    | (0.28, 1.23)  | .<.01   |
| Age: 36-45                                       | 0.43                    | (0.03, 0.84)  | .04     |
| Age: 46-55                                       | 0.37                    | (-0.04, 0.78) | .08     |
| Age: 56-65                                       | 0.29                    | (-0.14, 0.72) | .19     |
| Age: 65+                                         | -0.14                   | (-1.48, 1.20) | .84     |
| Education: High School                           | -0.40                   | (-0.71,-0.09) | 0.01    |
| Education: Some College                          | -0.38                   | (-0.77,0.01)  | .06     |
| Education: College                               | -0.49                   | (-0.81,-0.17) | <.01    |
| Education: Graduate School                       | -0.33                   | (-0.72,0.06)  | .10     |
| Extroversion                                     | 0.06                    | (0.02, 0.10)  | <.01    |
| Openness                                         | 0.02                    | (-0.02,0.07)  | .32     |
| Agreeableness                                    | 0.02                    | (-0.04,0.08)  | .53     |
| Conscientiousness                                | 0.01                    | (-0.04,0.05)  | .71     |
| Neuroticism                                      | -0.001                  | (-0.04,0.04)  | .97     |
| Time at home                                     | -0.08                   | (-0.31,0.16)  | .52     |
| Provincial number of infected cases (log)        | 0.61                    | (0.49,0.74)   | <0.01   |
| COVID Job Impact                                 | Yes                     |               |         |
| FE Occupation                                    | Yes                     |               |         |
| FE date                                          | Yes                     |               |         |
| High × Female                                    | 0.10                    | (-0.18,0.38)  | .49     |
| High × Age: 26-35                                | 0.01                    | (-0.66,0.68)  | .97     |
| High × Age: 36-45                                | 0.65                    | (0.07,1.22)   | .03     |
| High × Age: 46-55                                | 0.61                    | (0.04,1.18)   | .04     |
| High × Age: 56-65                                | 0.78                    | (0.19,1.37)   | <.01    |
| High × Age: 65+                                  | 2.01                    | (0.30,3.72)   | .01     |
| High × Education: High School                    | 0.53                    | (0.11,0.96)   | .01     |
| High × Education: Some College                   | 0.53                    | (0.01,1.06)   | .05     |
| High × Education: College                        | 0.38                    | (-0.05,0.82)  | .09     |
| High × Education: Graduate School                | 0.02                    | (-0.53,0.56)  | .96     |
| High × Extroversion                              | 0.06***                 | (0.02,0.10)   | .39     |
| High × Openness                                  | -0.05                   | (-0.11,0.02)  | .13     |
| High × Agreeableness                             | -0.02                   | (-0.10,0.07)  | .69     |
| High × Conscientiousness                         | -0.004                  | (-0.07,0.06)  | .89     |
| High × Neuroticism                               | -0.01                   | (-0.07,0.05)  | .67     |
| High × Time at home                              | 0.09                    | (-0.24,0.42)  | .59     |
| High × Provincial number of infected cases (log) | -0.63                   | (-0.81,-0.46) | <.01    |
| High × COVID Job Impact                          | Yes                     |               |         |
| High × FE Occupation                             | Yes                     |               |         |
| High × FE date                                   | Yes                     |               |         |

*Note:* This model only includes observations who live in areas with a prevalence of mask-wearing behavior of 40% or below (*Low*, low prevalence areas) and 60% or above (*High*, high prevalence areas) ( $n = 3, 318$ ).
